# Supplementary material for: Long-term stability and scale-up of noncovalently bound gold nanoparticle-siRNA suspensions
Source: publisher site journal article supplement (doi:10.3762/bjnano.10.248), 2019-12-23
Supplement: Additional file 1 [file 2190-4286-10-248-S1.pdf]

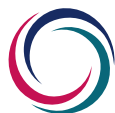

## Supporting Information

for

### **Long-term stability and scale-up of noncovalently bound gold nanoparticle-siRNA suspensions**

Anna V. Epanchintseva, Julia E. Poletaeva, Dmitrii V. Pyshnyi, Elena I. Ryabchikova  
and Inna A. Pyshnaya

*Beilstein J. Nanotechnol.* **2019**, *10*, 2568–2578. doi:10.3762/bjnano.10.248

## Additional experimental data

**Table S1:** Values of AuNP-siRNA  $\zeta$ -potential.

| Sample | Peak 1, mV      | Peak 1, %      | Peak 2, mV       | Peak 2, %      | Peak 3, mV       | Peak 3, %     |
|--------|-----------------|----------------|------------------|----------------|------------------|---------------|
| 1x     | $-38.9 \pm 2.7$ | $89.4 \pm 5.1$ | $-78.8 \pm 10.9$ | $10.8 \pm 8.0$ | $-96.4 \pm 8.0$  | $1.0 \pm 0.5$ |
| 10x    | $-49.4 \pm 2.1$ | $88.4 \pm 6.6$ | $-20.6 \pm 8.0$  | $8.5 \pm 4.8$  | $-90.6 \pm 16.3$ | $2.1 \pm 4.4$ |

---

Value of bare AuNPs  $\zeta$ -potential is  $-33.6 \pm 2.0$  mV.

**Table S2:** Hydrodynamic parameters of AuNP-siRNA suspensions during storage at 4 °C.

| Sample | Duration of storage, days | Diameter, nm <sup>a</sup> | PdI <sup>a</sup>   |
|--------|---------------------------|---------------------------|--------------------|
| 1x     | 0                         | $33.39 \pm 1.1$           | $0.266 \pm 0.025$  |
| 1x     | 1                         | $40.14 \pm 3.17$          | $0.322 \pm 0.01$   |
| 1x     | 8                         | $35.35 \pm 4.14$          | $0.296 \pm 0.005$  |
| 10x    | 0                         | $37.51 \pm 1.65$          | $0.304 \pm 0.010$  |
| 10x    | 1                         | $36.8 \pm 4.17$           | $0.326 \pm 0.006$  |
| 10x    | 8                         | $34.91 \pm 3.31$          | $0.3000 \pm 0.005$ |

---

<sup>a</sup> each value was calculated using at least three measurements

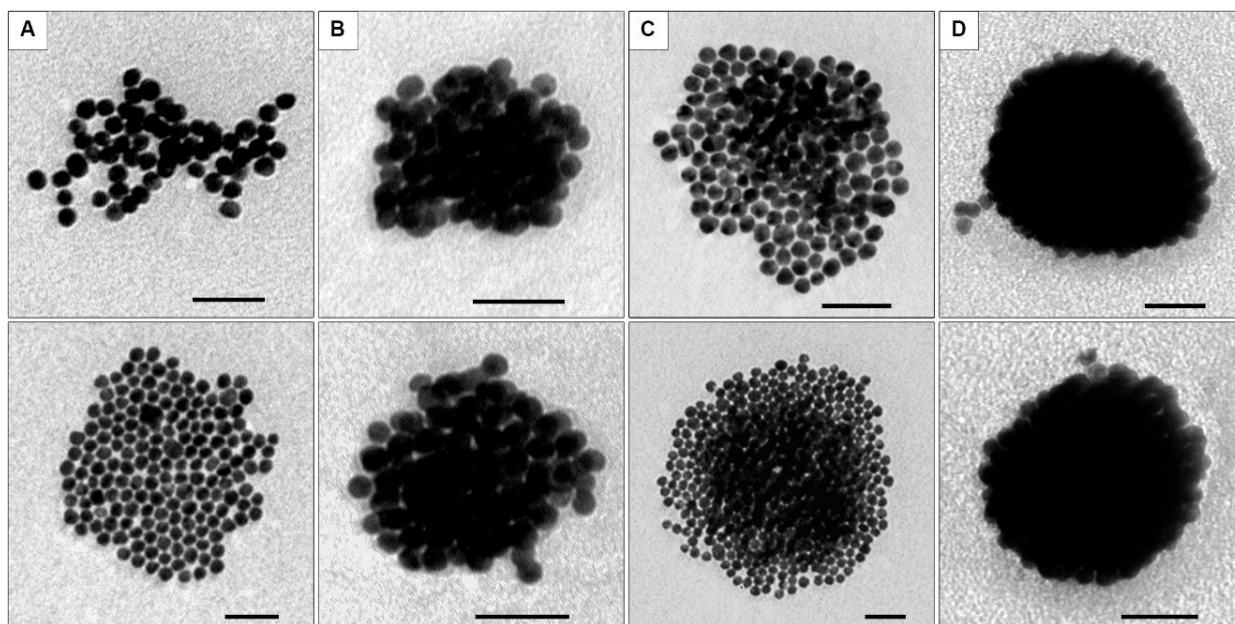

**Figure S1:** Different structures of AuNP-siRNA clusters observed in  $\times 1$  and  $\times 10$  AuNP-siRNA samples. All grids were prepared identically, without drying of a drop. Scale bars correspond to 50 nm.

Morphology of the clusters reflects the degree of particles clumping. Type **A** - Chains and “figures” of AuNPs-siRNA, - represent initial stages of clumping; are present in all samples. The particles are clearly separated with electron lucent space. Type **B** - Homogeneous loose rounded clusters formed by distinguishable particles, - represent more close interaction of particles. Type **C** - Rounded clusters with a multilayer core, - reflect an increase in the cluster size around the previously formed core. Type **D** - Compact rounded clusters, without peripheral single-layer zone, individual particles can be distinguished only at the periphery.

Freshly prepared and stored for one day samples  $\times 1$  contained clusters of type A, and samples  $\times 10$  – types A and B. Storage for eight days resulted in the formation of clusters of type C (mainly in samples  $\times 1$ ) and type D – in samples  $\times 10$ .

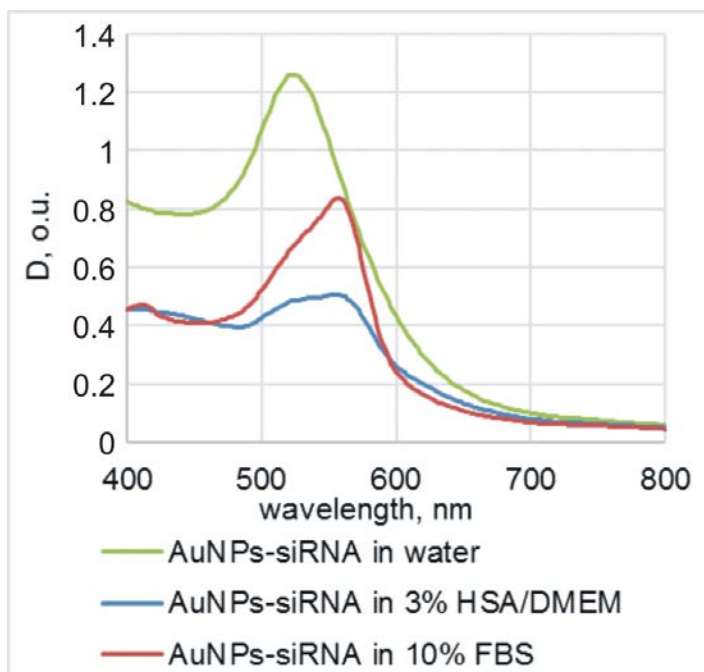

**Figure S2:** Optical extinction spectra of fresh AuNP-siRNA after 7 month storage after mixing with in various solutions.

**Table S3:** Surface density of siRNA after different storage periods of AuNPs-siRNA.

| Duration of storage, days | Surface density, mol/AuNP |
|---------------------------|---------------------------|
| 0                         | $102.5 \pm 3.5$           |
| 1                         | $101.3 \pm 0.1$           |
| 8                         | $101.8 \pm 1.1$           |
| 14                        | $101.3 \pm 0.1$           |
| 21                        | $100.8 \pm 0.5$           |
| 28                        | $101.8 \pm 0.5$           |

**Synthesis of AuNPs** was performed similarly to described in [1].

The solution of  $\text{HOC}(\text{COONa})(\text{CH}_2\text{COONa})_2 \times 3\text{H}_2\text{O}$  (5 mL, 38.8 mM) was added under stirring to the boiled solution of  $\text{HAuCl}_4 \times 3\text{H}_2\text{O}$  (45 mL, 1 mM), and the mixture was

intensively stirred for 20 min. The mixture was then cooled to room temperature, kept for 24 h, and filtered through the filter with the pore size of 45  $\mu\text{m}$ .

The resulting suspension of AuNPs with a concentration of  $3.5 \cdot 10^{-9}$  M was stored at 4°C,  $\epsilon_{260} = 8.78 \times 10^8 \text{ M}^{-1} \text{ cm}^{-1}$  [2].

## References

1. Frens, G. *Nature* **1973**, 24, 20–22.
2. Liu, X.; Atwater, M.; Wang, J.; Huo, Q. *Colloids Surf. B: Biointerfaces* **2007**, 58, 3–7.
